# Supplementary material for: RNA-sequencing reveals long-term effects of silver nanoparticles on human lung cells
Source: PubMed Central journal article supplement (PMC5923294; doi:10.1038/s41598-018-25085-5), 2018-04-27
Supplement: 41598_2018_25085_MOESM1_ESM.pdf [file 41598_2018_25085_MOESM1_ESM.pdf]

SUPPORTING INFORMATION

**RNA-sequencing reveals long-term effects of silver nanoparticles on human lung cells**

Anda R. Gliga<sup>1</sup>, Sebastiano Di Bucchianico<sup>1</sup>, Jessica Lindvall<sup>2</sup>, Bengt Fadeel<sup>3</sup>, and Hanna L.  
Karlsson<sup>1</sup>

<sup>1</sup>Unit of Biochemical Toxicology, Institute of Environmental Medicine, Karolinska Institutet,  
Stockholm, Sweden;

<sup>2</sup>National Bioinformatics Infrastructure Sweden, Science for Life Laboratory, Department of  
Biochemistry and Biophysics, Stockholm University, Stockholm, Sweden;

<sup>3</sup>Division of Molecular Toxicology, Institute of Environmental Medicine, Karolinska  
Institutet, Stockholm, Sweden.

**Running title:** Silver nanoparticles induce epithelial-to-mesenchymal transition.

**Supplementary Table 1. Significantly enriched pathways Ag10 vs Control.**

| Ingenuity Canonical Pathways                                                   | $-\log(p\text{-value})$ | z-score |
|--------------------------------------------------------------------------------|-------------------------|---------|
| Adipogenesis pathway                                                           | 4,27                    | NaN     |
| Atherosclerosis Signaling                                                      | 3,98                    | NaN     |
| Axonal Guidance Signaling                                                      | 3,92                    | NaN     |
| Gα12/13 Signaling                                                              | 3,90                    | 0,218   |
| Eicosanoid Signaling                                                           | 3,15                    | 1,89    |
| STAT3 Pathway                                                                  | 3,08                    | 1,069   |
| Hepatic Fibrosis / Hepatic Stellate Cell Activation                            | 3,00                    | NaN     |
| Xenobiotic Metabolism Signaling                                                | 2,75                    | NaN     |
| Type I Diabetes Mellitus Signaling                                             | 2,53                    | NaN     |
| LPS/IL-1 Mediated Inhibition of RXR Function                                   | 2,48                    | -0,333  |
| Acute Phase Response Signaling                                                 | 2,47                    | -0,728  |
| Aryl Hydrocarbon Receptor Signaling                                            | 2,47                    | NaN     |
| Serine Biosynthesis                                                            | 2,44                    | NaN     |
| Glutamate Degradation III (via 4-aminobutyrate)                                | 2,44                    | NaN     |
| Ephrin Receptor Signaling                                                      | 2,32                    | NaN     |
| Leukocyte Extravasation Signaling                                              | 2,21                    | 1,091   |
| Wnt/Ca+ pathway                                                                | 2,13                    | 1,897   |
| SAPK/JNK Signaling                                                             | 2,04                    | 0       |
| Regulation of the Epithelial-Mesenchymal Transition Pathway                    | 2,03                    | NaN     |
| Inhibition of Angiogenesis by TSP1                                             | 1,96                    | 0,447   |
| Superpathway of Serine and Glycine Biosynthesis I                              | 1,95                    | NaN     |
| Role of Macrophages, Fibroblasts and Endothelial Cells in Rheumatoid Arthritis | 1,91                    | NaN     |
| p38 MAPK Signaling                                                             | 1,91                    | -0,535  |
| p53 Signaling                                                                  | 1,89                    | 0,302   |
| 1,25-dihydroxyvitamin D3 Biosynthesis                                          | 1,81                    | NaN     |
| 4-aminobutyrate Degradation I                                                  | 1,81                    | NaN     |
| Colorectal Cancer Metastasis Signaling                                         | 1,79                    | 1,8     |
| Phenylalanine Degradation IV (Mammalian, via Side Chain)                       | 1,78                    | NaN     |
| Antiproliferative Role of Somatostatin Receptor 2                              | 1,78                    | 1,414   |
| Intrinsic Prothrombin Activation Pathway                                       | 1,75                    | NaN     |
| Human Embryonic Stem Cell Pluripotency                                         | 1,69                    | NaN     |
| PPAR Signaling                                                                 | 1,68                    | 0       |
| Dendritic Cell Maturation                                                      | 1,66                    | 0       |
| FGF Signaling                                                                  | 1,65                    | -1,732  |
| Inhibition of Matrix Metalloproteases                                          | 1,64                    | NaN     |
| Glioma Invasiveness Signaling                                                  | 1,63                    | -0,333  |
| Role of NFAT in Cardiac Hypertrophy                                            | 1,62                    | 0,218   |
| Wnt/β-catenin Signaling                                                        | 1,60                    | 2,324   |
| Phospholipases                                                                 | 1,59                    | NaN     |
| PTEN Signaling                                                                 | 1,56                    | -1,604  |
| Neuregulin Signaling                                                           | 1,54                    | 1,414   |
| P2Y Purigenic Receptor Signaling Pathway                                       | 1,53                    | 1,291   |
| Retinoate Biosynthesis II                                                      | 1,53                    | NaN     |
| Phenylethylamine Degradation I                                                 | 1,53                    | NaN     |
| Role of MAPK Signaling in the Pathogenesis of Influenza                        | 1,52                    | NaN     |
| NF-κB Signaling                                                                | 1,50                    | -1,342  |
| IL-8 Signaling                                                                 | 1,50                    | 0,655   |
| Gαi Signaling                                                                  | 1,50                    | 2,333   |
| Ovarian Cancer Signaling                                                       | 1,49                    | NaN     |
| Clathrin-mediated Endocytosis Signaling                                        | 1,48                    | NaN     |
| HIF1α Signaling                                                                | 1,42                    | NaN     |
| Role of IL-17F in Allergic Inflammatory Airway Diseases                        | 1,38                    | 0       |
| Ephrin B Signaling                                                             | 1,38                    | 0       |
| D-myo-inositol-5-phosphate Metabolism                                          | 1,38                    | NaN     |
| 3-phosphoinositide Degradation                                                 | 1,35                    | NaN     |
| Thrombin Signaling                                                             | 1,35                    | -0,243  |
| NRF2-mediated Oxidative Stress Response                                        | 1,35                    | 0,816   |
| Creatine-phosphate Biosynthesis                                                | 1,33                    | NaN     |
| FXR/RXR Activation                                                             | 1,31                    | NaN     |
| TR/RXR Activation                                                              | 1,31                    | NaN     |

Pathway analysis was performed in IPA on the differentially expressed genes of the contrast Ag10 *versus* Control. Significantly enriched canonical pathways ( $-\log(p\text{-value}) > 1.3$ ) are illustrated, ordered according to the statistical significance ( $-\log(p\text{-value})$ ). Some pathways are additionally characterized by z-score, a measure of the activation state of the pathway. NaN, activity pattern not available.

**Supplementary Table 2. Upstream regulator analysis by IPA.**

| Upstream Regulator | Expr Log Ratio | Predicted Activation State | Activation z-score | p-value of overlap | Upstream Regulator | Expr Log Ratio | Predicted Activation State | Activation z-score | p-value of overlap |
|--------------------|----------------|----------------------------|--------------------|--------------------|--------------------|----------------|----------------------------|--------------------|--------------------|
| TP53               |                | Activated                  | 2,571              | 6,61E-20           | MYB                |                |                            | 0,745              | 5,94E-03           |
| SMARCA4            |                | Activated                  | 3,035              | 3,63E-14           | CREB3L1            | 1,879          |                            | 0,555              | 5,94E-03           |
| CTNNB1             |                |                            | 1,05               | 7,30E-11           | SPDEF              |                |                            | -1,667             | 6,02E-03           |
| GLI1               |                |                            | 0,461              | 7,64E-11           | TRIM28             |                |                            | 1                  | 6,15E-03           |
| NEUROG1            |                |                            | 0,655              | 9,40E-10           | STAT6              |                |                            | 0,188              | 6,27E-03           |
| FOS                |                |                            | -0,142             | 1,91E-09           | RELA               |                |                            | -0,262             | 6,28E-03           |
| ERG                |                |                            | 1,279              | 3,09E-09           | SMAD3              |                |                            | 0,259              | 6,37E-03           |
| HIF1A              | -0,365         | Activated                  | 2,609              | 1,08E-08           | HTATIP2            | 0,462          |                            |                    | 7,61E-03           |
| NKX2-3             |                | Activated                  | 2,082              | 1,59E-08           | SNAI2              |                |                            | 1,194              | 7,82E-03           |
| PAX3               |                |                            | -1,165             | 4,56E-08           | KLF6               |                |                            | 0,041              | 7,85E-03           |
| SP1                |                | Activated                  | 2,237              | 3,82E-07           | STAT4              |                |                            | 0,949              | 8,00E-03           |
| TAF4               |                |                            | -0,042             | 5,06E-07           | SIRT1              | -0,39          |                            | 0,742              | 8,31E-03           |
| CEBPA              |                |                            | -1,281             | 7,31E-07           | NOTCH3             | 1,314          |                            | 1,534              | 9,00E-03           |
| CBX5               |                |                            | -0,816             | 8,49E-07           | EGR2               |                | Activated                  | 3,018              | 9,28E-03           |
| CREB1              | -0,386         |                            | 0,107              | 1,46E-06           | BHLHA15            |                |                            |                    | 9,37E-03           |
| TWIST1             |                | Activated                  | 4,084              | 2,42E-06           | MTPN               |                | Activated                  | 2,354              | 9,46E-03           |
| STAT3              |                |                            | 1,713              | 2,55E-06           | SMAD7              |                |                            | -1,523             | 9,49E-03           |
| TP73               |                |                            | 0,69               | 3,38E-06           | HDAC2              |                |                            | 0,632              | 9,49E-03           |
| ZEB1               |                | Activated                  | 2,27               | 3,63E-06           | EZH2               | -0,368         |                            | 0,307              | 9,49E-03           |
| SOX4               | -0,705         |                            | 1,554              | 4,73E-06           | HOXD3              |                |                            | 1,4                | 9,59E-03           |
| PAX7               |                |                            | -0,842             | 5,10E-06           | ARNT               |                |                            | 1,463              | 1,15E-02           |
| ATF4               |                | Activated                  | 3,119              | 8,62E-06           | SIN3B              |                |                            |                    | 1,19E-02           |
| NFYB               | -0,432         |                            |                    | 1,23E-05           | EGR1               |                |                            | 0,962              | 1,21E-02           |
| EP300              |                |                            | 1,04               | 1,34E-05           | POU5F1             |                |                            | -0,102             | 1,22E-02           |
| STAT5A             |                |                            | -1,547             | 1,46E-05           | PSMC5              |                |                            |                    | 1,33E-02           |
| SOX11              |                |                            | 0,346              | 2,18E-05           | GLI2               |                |                            | -0,676             | 1,33E-02           |
| SP3                |                |                            | 1,213              | 3,20E-05           | LCOR               |                |                            |                    | 1,33E-02           |
| NFKBIA             |                | Activated                  | 2,089              | 4,57E-05           | PRDM16             |                |                            |                    | 1,37E-02           |
| MYOCD              |                |                            | -0,344             | 6,16E-05           | H2AFX              |                |                            |                    | 1,45E-02           |
| KLF2               | 1,374          |                            | 1,729              | 7,35E-05           | SKI                |                |                            | -1,387             | 1,45E-02           |
| ZNF217             | -0,379         |                            | -1,414             | 8,61E-05           | PITX2              |                |                            | -0,87              | 1,50E-02           |
| HNF1B              |                |                            | -1,394             | 9,47E-05           | GRHL2              | -2,36          |                            | -1                 | 1,60E-02           |
| VHL                |                |                            | 0,71               | 9,51E-05           | CNOT7              |                |                            |                    | 1,68E-02           |
| SMAD4              |                |                            | 0,117              | 1,06E-04           | ZFP36              |                |                            | 1,069              | 1,70E-02           |
| PDX1               |                |                            | 0                  | 1,20E-04           | FOXO1              |                |                            | 2                  | 1,70E-02           |
| NCOA4              |                |                            | 1,706              | 1,20E-04           | CDX2               |                |                            | 0,208              | 1,70E-02           |
| CCND1              |                |                            | -1,897             | 1,56E-04           | KLF4               |                |                            | -0,226             | 1,90E-02           |
| BRCA1              |                |                            | 0,774              | 1,65E-04           | HMGAI1             |                |                            | 0,075              | 2,02E-02           |
| SIAH2              |                |                            | -1,96              | 2,37E-04           | SIX5               |                |                            | 0,447              | 2,10E-02           |
| EHF                | -0,851         |                            | -0,775             | 2,56E-04           | MECP2              |                |                            | 0,426              | 2,13E-02           |
| MYC                |                |                            | -0,529             | 2,96E-04           | HLX                |                |                            | -0,896             | 2,25E-02           |
| MITF               |                |                            | -0,348             | 3,23E-04           | PTTG1              |                |                            | 1,455              | 2,25E-02           |
| SOX2               |                |                            | 1,43               | 3,33E-04           | ZNF24              |                |                            |                    | 2,54E-02           |
| PRDM1              | 1,276          |                            | -0,632             | 4,30E-04           | NACA               |                |                            |                    | 2,54E-02           |
| TBX5               |                |                            | -0,853             | 4,47E-04           | KLF5               |                |                            | -0,595             | 2,63E-02           |
| E2F1               |                | Inhibited                  | -3,15              | 5,98E-04           | WWC1               | -0,744         |                            |                    | 2,64E-02           |
| TRPS1              |                |                            | -1,134             | 6,29E-04           | RUVBL2             |                |                            |                    | 2,64E-02           |
| CREBBP             |                |                            | -1,099             | 6,97E-04           | Cux1               |                |                            |                    | 2,64E-02           |
| RUNX2              |                |                            | -0,608             | 7,26E-04           | HOXA9              |                |                            | 0,102              | 2,72E-02           |
| ARNT2              |                |                            | 0,962              | 8,38E-04           | HTT                | 0,466          |                            | 1,814              | 2,79E-02           |
| TFAP2A             |                |                            | 0,794              | 8,47E-04           | LHX2               |                |                            | 0                  | 2,90E-02           |
| HOXC8              |                |                            | -0,707             | 8,80E-04           | ZEB2               | 1,051          |                            | 1,974              | 2,90E-02           |
| PLAG1              |                |                            | 0,389              | 1,06E-03           | YBX1               |                |                            | 0,197              | 2,91E-02           |
| MYCN               |                |                            | -0,543             | 1,12E-03           | GLIS2              |                | Inhibited                  | -2                 | 3,05E-02           |
| SQSTM1             |                |                            | 1,418              | 1,24E-03           | MAX                |                |                            | 1                  | 3,17E-02           |
| TP63               | -2,917         |                            | -1,974             | 1,30E-03           | YAP1               |                |                            |                    | 3,17E-02           |
| HAND2              |                |                            | -1,129             | 1,50E-03           | SATB1              |                |                            | -0,276             | 3,28E-02           |
| CEBPB              |                |                            | -0,573             | 1,51E-03           | MEN1               |                |                            | -0,817             | 3,33E-02           |
| NKX2-1             |                |                            |                    | 1,62E-03           | POU2F1             |                |                            |                    | 3,41E-02           |
| GTF2I              |                |                            |                    | 1,74E-03           | LMX1B              |                |                            |                    | 3,46E-02           |
| NFIB               |                |                            |                    | 1,79E-03           | FOXD3              |                |                            |                    | 3,46E-02           |
| MEF2C              | 0,991          |                            | -1,453             | 2,19E-03           | ID4                |                |                            |                    | 3,46E-02           |
| NOTCH1             |                |                            | -0,986             | 2,22E-03           | EBF2               |                |                            | 1,192              | 3,67E-02           |
| SNAI1              |                | Activated                  | 2,757              | 2,54E-03           | CALR               |                |                            | 0,555              | 3,76E-02           |
| NFE2L2             |                | Activated                  | 2,023              | 2,64E-03           | TCF7L2             |                |                            | -0,895             | 3,76E-02           |
| CREB3L4            |                |                            |                    | 2,85E-03           | MSC                | 1,698          |                            | 1,414              | 3,86E-02           |
| SRF                |                |                            | 0,654              | 2,92E-03           | MKX                |                |                            |                    | 4,05E-02           |
| GATA4              |                |                            | -0,826             | 3,42E-03           | MAFK               |                |                            |                    | 4,34E-02           |
| HDAC6              |                |                            | 1,555              | 3,57E-03           | SATB2              |                |                            |                    | 4,38E-02           |
| EPAS1              |                |                            | 0,415              | 4,40E-03           | PRDM8              | 1,428          |                            |                    | 4,38E-02           |
| Sry                |                |                            |                    | 4,65E-03           | MEF2A              |                |                            | 0                  | 4,43E-02           |
| KDM5B              |                |                            | 0,256              | 4,78E-03           | HOXA7              |                |                            | -1,342             | 4,43E-02           |
| NUPR1              | 1,276          |                            | 1,286              | 5,25E-03           | RB1                |                |                            | 0,71               | 4,86E-02           |
| SIM1               | 0,93           |                            | 0,6                | 5,33E-03           | SREBF1             |                |                            | -0,372             | 4,87E-02           |
| IKZF1              |                | Inhibited                  | -2,048             | 5,77E-03           | GF1                |                |                            | 1,827              | 5,16E-02           |

Upstream regulator analysis was performed in IPA for transcription factors. Some of these molecules were also differentially expressed (indicated by the expr log ratio column). The activation state is predicted from the z-score.

### Supplementary Table 3. Significantly enriched gene ontologies.

|                                                                                                                                                              | Level | q   | p        |
|--------------------------------------------------------------------------------------------------------------------------------------------------------------|-------|-----|----------|
| <b>BIOLOGICAL PROCESS</b>                                                                                                                                    |       |     |          |
| angiogenesis                                                                                                                                                 | 10    | 49  | 1,85E-12 |
| cell adhesion                                                                                                                                                | 3     | 110 | 4,28E-11 |
| regulation of endothelial cell proliferation                                                                                                                 | 6     | 20  | 8,08E-10 |
| extracellular matrix organization                                                                                                                            | 4     | 46  | 1,96E-09 |
| positive regulation of signaling                                                                                                                             | 4     | 111 | 8,77E-09 |
| blood coagulation                                                                                                                                            | 5     | 55  | 1,31E-08 |
| chemotaxis                                                                                                                                                   | 4     | 69  | 6,80E-08 |
| negative regulation of transmembrane receptor protein serine/threonine kinase signaling pathway                                                              | 7     | 19  | 3,13E-07 |
| negative regulation of epithelial cell proliferation                                                                                                         | 6     | 18  | 5,36E-07 |
| glycosaminoglycan biosynthetic process                                                                                                                       | 6     | 19  | 5,98E-07 |
| negative regulation of cellular response to growth factor stimulus                                                                                           | 5     | 19  | 7,21E-07 |
| cell growth                                                                                                                                                  | 3     | 13  | 9,12E-07 |
| dicarboxylic acid catabolic process                                                                                                                          | 8     | 7   | 1,30E-06 |
| positive regulation of epithelial cell proliferation                                                                                                         | 6     | 22  | 1,97E-06 |
| collagen metabolic process                                                                                                                                   | 5     | 16  | 3,23E-06 |
| glycosaminoglycan catabolic process                                                                                                                          | 6     | 13  | 3,42E-06 |
| regulation of peptidase activity                                                                                                                             | 6     | 34  | 4,12E-06 |
| cell migration                                                                                                                                               | 5     | 81  | 4,59E-06 |
| canonical Wnt receptor signaling pathway                                                                                                                     | 7     | 10  | 4,76E-06 |
| positive regulation of ion transport                                                                                                                         | 6     | 22  | 5,44E-06 |
| <b>CELLULAR COMPONENT</b>                                                                                                                                    |       |     |          |
| cytosol                                                                                                                                                      | 7     | 253 | 8,67E-27 |
| integral to plasma membrane                                                                                                                                  | 7     | 142 | 8,61E-19 |
| extracellular region part                                                                                                                                    | 2     | 147 | 1,87E-17 |
| extracellular matrix                                                                                                                                         | 1     | 80  | 2,01E-14 |
| endomembrane system                                                                                                                                          | 3     | 194 | 2,81E-13 |
| cell surface                                                                                                                                                 | 3     | 73  | 2,83E-12 |
| cell projection                                                                                                                                              | 3     | 165 | 3,92E-12 |
| perinuclear region of cytoplasm                                                                                                                              | 7     | 64  | 1,22E-09 |
| plasma membrane                                                                                                                                              | 4     | 444 | 2,78E-09 |
| lysosome                                                                                                                                                     | 9     | 48  | 3,64E-08 |
| nuclear membrane                                                                                                                                             | 10    | 33  | 2,13E-07 |
| vacuolar lumen                                                                                                                                               | 9     | 13  | 1,96E-05 |
| cytoplasmic membrane-bounded vesicle                                                                                                                         | 8     | 99  | 3,50E-05 |
| apical part of cell                                                                                                                                          | 3     | 41  | 3,67E-05 |
| leading edge membrane                                                                                                                                        | 6     | 16  | 4,60E-05 |
| cell junction                                                                                                                                                | 1     | 87  | 4,77E-05 |
| cytoplasm                                                                                                                                                    | 5     | 891 | 0,00016  |
| platelet alpha granule                                                                                                                                       | 10    | 10  | 0,00025  |
| membrane raft                                                                                                                                                | 3     | 27  | 0,00039  |
| Z disc                                                                                                                                                       | 11    | 16  | 0,00041  |
| <b>MOLECULAR FUNCTION</b>                                                                                                                                    |       |     |          |
| protein binding                                                                                                                                              | 2     | 725 | 9,60E-66 |
| glycosaminoglycan binding                                                                                                                                    | 3     | 34  | 8,21E-11 |
| metal ion binding                                                                                                                                            | 4     | 381 | 6,30E-10 |
| sulfur compound binding                                                                                                                                      | 2     | 31  | 2,00E-09 |
| transcription cofactor activity                                                                                                                              | 3     | 51  | 6,17E-06 |
| protein phosphatase binding                                                                                                                                  | 5     | 14  | 2,11E-05 |
| lipid binding                                                                                                                                                | 2     | 99  | 2,66E-05 |
| aldo-keto reductase (NADP) activity                                                                                                                          | 5     | 6   | 6,24E-05 |
| monocarboxylic acid binding                                                                                                                                  | 5     | 11  | 6,36E-05 |
| tumor necrosis factor-activated receptor activity                                                                                                            | 6     | 5   | 0,00015  |
| receptor signaling protein activity                                                                                                                          | 3     | 17  | 0,00032  |
| steroid hormone receptor binding                                                                                                                             | 6     | 10  | 0,00034  |
| ubiquitin protein ligase binding                                                                                                                             | 5     | 17  | 0,00092  |
| extracellular matrix structural constituent                                                                                                                  | 2     | 12  | 0,00098  |
| RNA polymerase II core promoter proximal region sequence-specific DNA binding transcription factor activity involved in positive regulation of transcription | 5     | 12  | 0,00143  |
| structural constituent of muscle                                                                                                                             | 2     | 7   | 0,00205  |
| GDP binding                                                                                                                                                  | 8     | 7   | 0,00230  |
| mRNA binding                                                                                                                                                 | 5     | 14  | 0,00234  |
| acetylgalactosaminyltransferase activity                                                                                                                     | 5     | 6   | 0,00252  |
| Wnt-activated receptor activity                                                                                                                              | 5     | 5   | 0,00280  |

Gene ontology enrichment was performed as described in Methods. Top20 ontologies for each domain are illustrated, ordered according to the p-value. The cutoff for p-value was set at 0.05. (q, number of gene in ontology; p, p-value of enrichment)

**Supplementary Table 4. DNA methylation analysis (Illumina 450k)**

| Ag vs Control          | # FDR adjusted p-value < 0.05 | Site/Gene/Region ID | Chromosome | Start     | End       | Mean Difference Methylation Ag vs Control | Location of the region/site of interest                                                                                                                                                                                                                                                                                                                                                                                                                                                                         |
|------------------------|-------------------------------|---------------------|------------|-----------|-----------|-------------------------------------------|-----------------------------------------------------------------------------------------------------------------------------------------------------------------------------------------------------------------------------------------------------------------------------------------------------------------------------------------------------------------------------------------------------------------------------------------------------------------------------------------------------------------|
| <b>methylated site</b> | 6                             | cg21242448          | chr9       | 120510294 |           | -0.88                                     | intergenic region, S-shelf of CpG island                                                                                                                                                                                                                                                                                                                                                                                                                                                                        |
|                        |                               | cg05712748          | chr1       | 43472312  |           | 0.43                                      | intergenic region, N-shore of CpG island                                                                                                                                                                                                                                                                                                                                                                                                                                                                        |
|                        |                               | cg25673075          | chr5       | 111963982 |           | -0.74                                     | intergenic region, proximity of novel lincRNA ENSG00000250358                                                                                                                                                                                                                                                                                                                                                                                                                                                   |
|                        |                               | cg23492225          | chr10      | 2147217   |           | 0.33                                      | intergenic region                                                                                                                                                                                                                                                                                                                                                                                                                                                                                               |
|                        |                               | cg17858192          | chr4       | 16077807  |           | -0.42                                     | 5'UTR region, ENSG0000007062 (PROM1)                                                                                                                                                                                                                                                                                                                                                                                                                                                                            |
|                        |                               | cg04993605          | chr1       | 28573052  |           | -0.34                                     | H3K27Ac Mark (often found near active regulatory elements)<br>Binding site for transcription factors EP300, POLR2A, TEAD4, GATA3, SMC3, CEBPB, FOXA1, STAT3, FOXA2, FOS, MYBL2, ELK4, SIX5, NFATC1, FOXM1, NFIC                                                                                                                                                                                                                                                                                                 |
| <b>promoter level</b>  | 1                             | ENSG00000250358     | chr5       | 111962633 | 111964632 | -0.74                                     | novel lincRNA                                                                                                                                                                                                                                                                                                                                                                                                                                                                                                   |
| <b>tiling regions</b>  | 5                             | 331939              | chr9       | 120510001 | 120515000 | -0.88                                     | intergenic region                                                                                                                                                                                                                                                                                                                                                                                                                                                                                               |
|                        |                               | 198720              | chr5       | 111960001 | 111965000 | -0.74                                     | intergenic region, proximity of novel lincRNA ENSG00000250358                                                                                                                                                                                                                                                                                                                                                                                                                                                   |
|                        |                               | 220774              | chr6       | 41310001  | 41315000  | -0.45                                     | protein coding gene ENSG00000096264<br>region contains binding sites for transcriptions factors EBF1, TCF3, SP1, TCF12                                                                                                                                                                                                                                                                                                                                                                                          |
|                        |                               | 377076              | chr11      | 69445001  | 69450000  | 0.30                                      | intergenic region<br>region contains binding sites for SETDB1, CBX3, SIX5, NFYB, MAX, USF2, USF1, ATF3, ZNF143, CEBPB                                                                                                                                                                                                                                                                                                                                                                                           |
|                        |                               | 251232              | chr7       | 22480001  | 22485000  | 0.52                                      | H3K27Ac Mark (often found near active regulatory elements)<br>region contains binding sites for EZH2, SIN3AK20, ARID3A, MXI1, REST, FOXA1, TEAD4, HNF4G, FOXA2, NFIC, EP300, HDAC2, MYBL2, RXRA, HNF4A, ZNF217, SP1, EGR1, ZNF263, GATA3, GATA2, FOXA1, MYC, MBD4, POLR2A, CCNT2, SIRT6, RCOR1, FOS, JUND, CBX3, ATF1, HNF4G, TBP, ELF1, MAX, E2F6, BHLHE40, FOSL2, YY1, USF1, SPI1, POLR2A, ESR1, IRF4, RELA, JUN, BCL11A, NR3C1, EBF1, RUNX3, MTA3, IKZF1, CTCF, FOXM1, EBF1, PBX3, TAF1, TCF12, TCF3, MEF2A, |
| <b>gene</b>            | 0                             |                     |            |           |           |                                           |                                                                                                                                                                                                                                                                                                                                                                                                                                                                                                                 |
| <b>CpG Island</b>      | 0                             |                     |            |           |           |                                           |                                                                                                                                                                                                                                                                                                                                                                                                                                                                                                                 |

DNA methylation analysis following 6 weeks of BEAS-2B exposure to 1 µg/mL to Ag10 was performed using Illumina 450k. Differential methylation analysis was performed using the Bioconductor package RBeats for methylated sites, promoter level, tiling regions (regions with a window size of 5 kilobases), genes and CpG islands. Location data are derived from the UCSC and Ensembl genome browsers.

**A**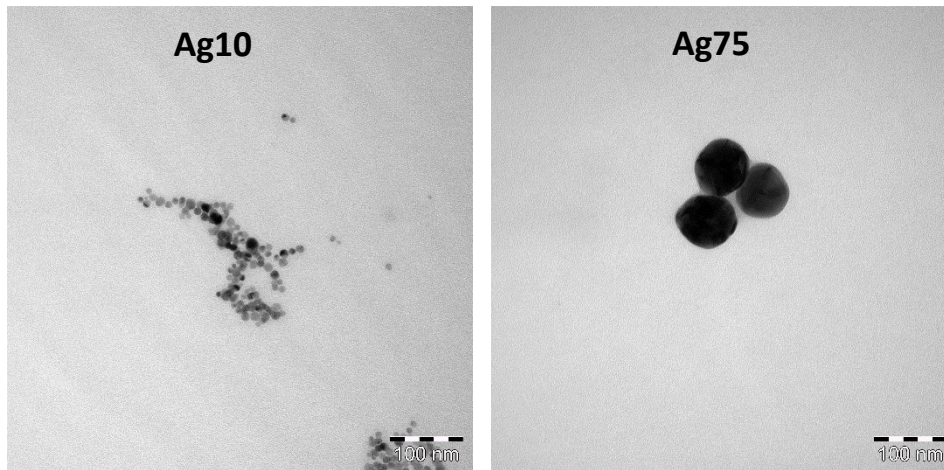**B**

|             | Time point (h) | Approx. size peak (nm) | size max | Scattered light intensity (average, kcps) | Zeta-potential (average, mV) |
|-------------|----------------|------------------------|----------|-------------------------------------------|------------------------------|
| <b>Ag10</b> | 0 h            | 10, 1000               |          | 730                                       | -0.587                       |
|             | 24 h           | 10, 100, 1000          |          | 63                                        | N.D.                         |
| <b>Ag75</b> | 0 h            | 3.5, 40, 400           |          | 2790                                      | -7.78                        |
|             | 24 h           | 5, 100, 1000           |          | 1100                                      | N.D.                         |

**C**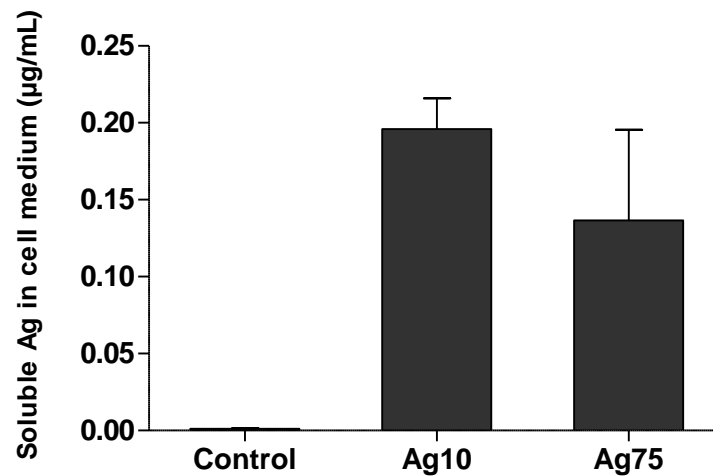

**Suppl. Figure 1. Characterization of AgNPs.** (A) Primary particle size was confirmed using TEM. (B) Hydrodynamic size-distribution in BEGM (data from Gliga *et al* 2014) and zeta potential values in BEGM medium. (C) Soluble Ag content in cell medium investigated by ICP-MS. Cell supernatants were harvested 4 days after exposure to 1 µg/mL AgNPs and centrifuged 15000 rpm for 30 min. 150 µL supernatant was carefully collected and analyzed by ICP-MS as described in Methods. Results are presented as mean soluble silver (µg/mL) ± S.D. (n=3).

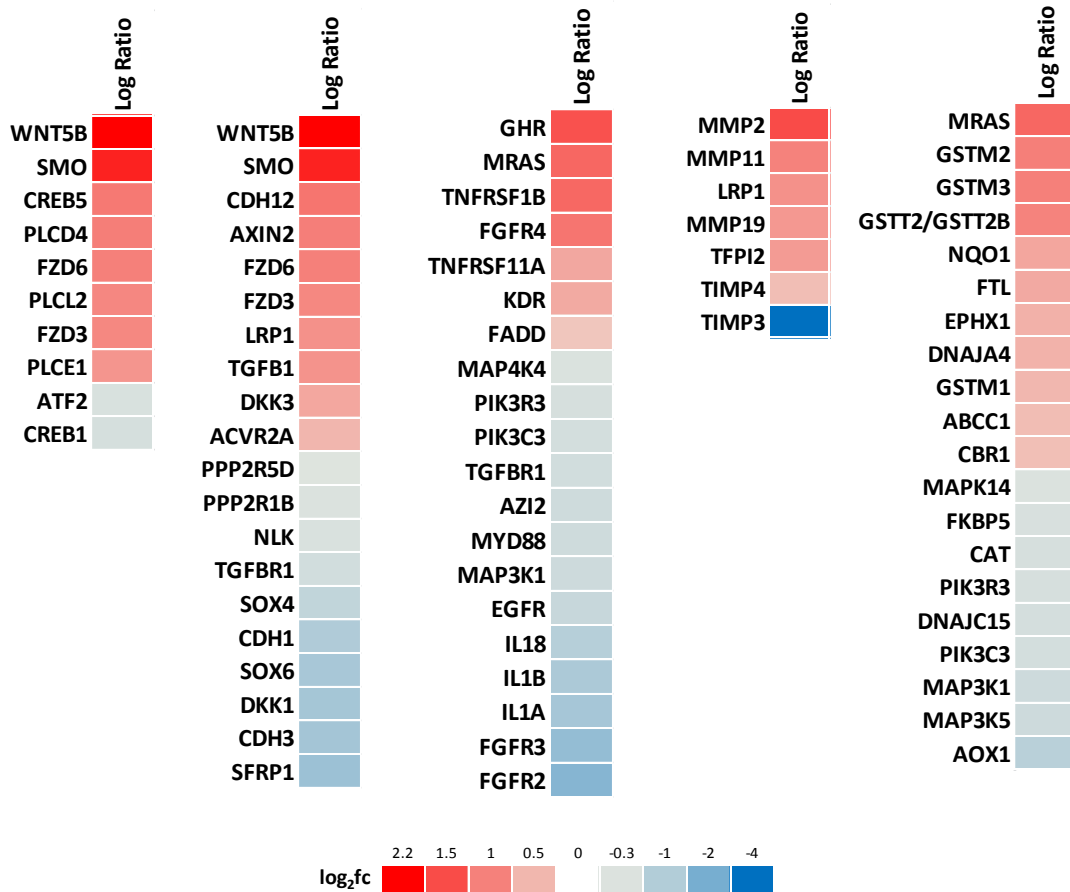

**Suppl. Figure 2.** Ingenuity Pathway Analysis identified enriched pathways after 6-week exposure of BEAS-2B cells to Ag10. Using the IPA tool, we performed downstream pathway analysis of the DEGs for Ag10. Heatmaps displaying the gene expression changes in the Ag10 vs Control were generated for the Wnt/Ca<sup>2+</sup> pathway (A), Wnt/ $\beta$ catenin signalling (B), NF- $\kappa$ B signalling (C), Inhibition of Matrix Metalloproteases (D) and NRF-2 mediated Oxidative Stress response (E).

**A**

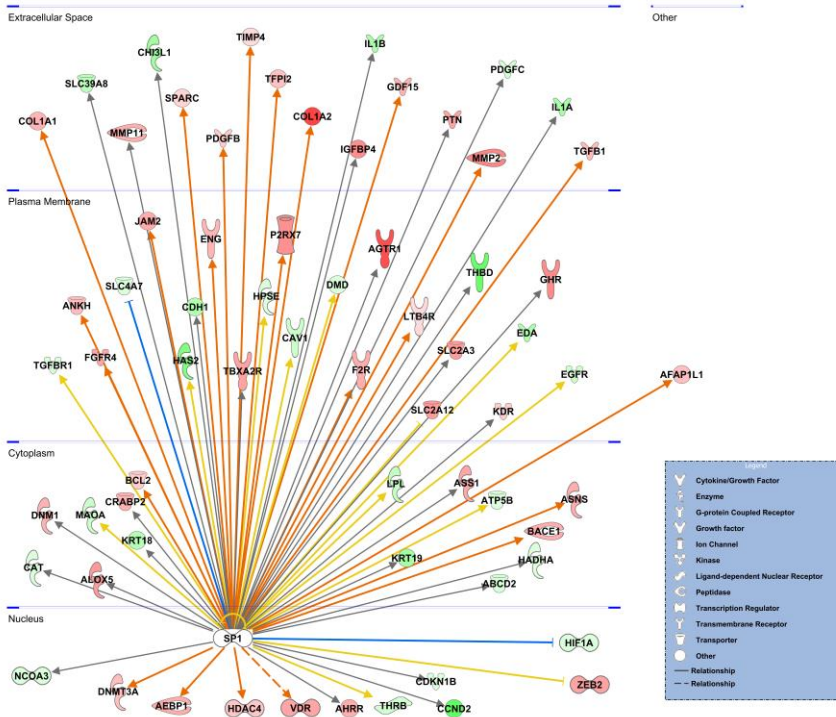

**B**

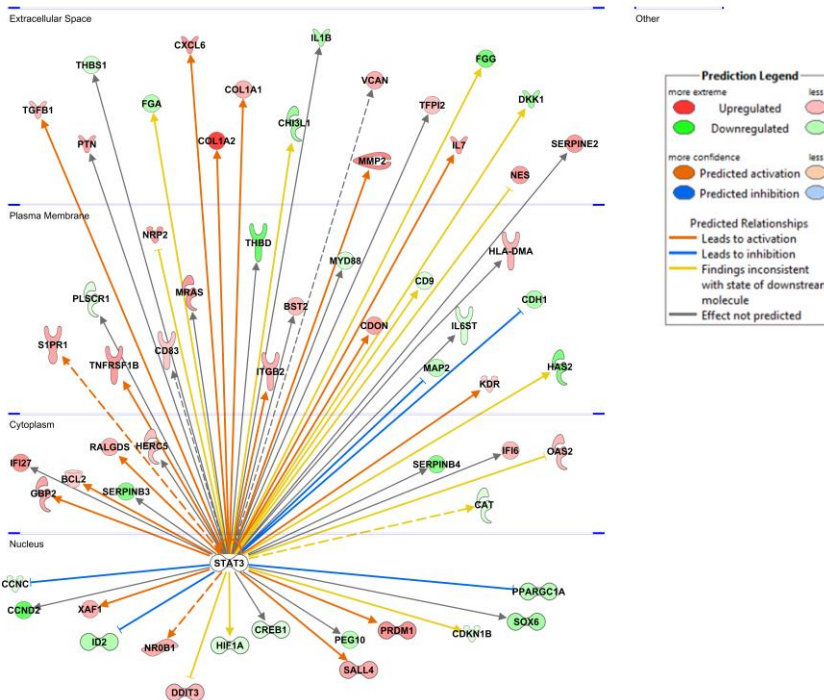

**Suppl. Figure 3.** SP1 and STAT3 transcription factors. Upstream regulator analysis was performed using IPA for Ag10 and a network was generated around the predicted top 2 transcription factors SP1 (A) and STAT3 (B) which had an absolute z-score higher than 1.5 and were also found to bind differentially methylated sites or regions in the DNA methylation assay.



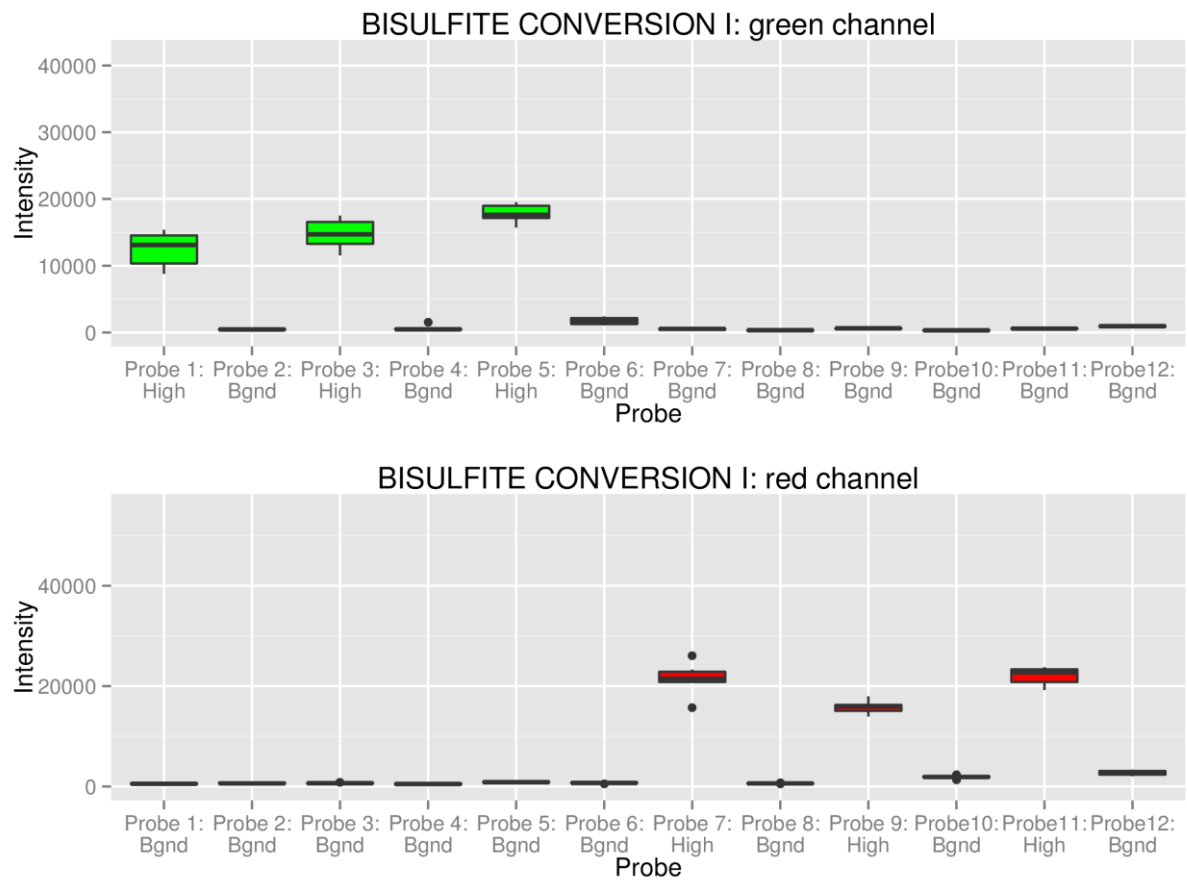

**Suppl. Figure 4.** Box-plot showing bisulfite conversion to test the efficiency of bisulfite conversion by query of C/T polymorphism. The green output shows Type I bisulfite conversion and the red channels reflects the reading of the type II bisulfite conversion data. Overall output showed that the bisulfite conversion was successful and, hence, the DNA methylation worked as expected.

### Control

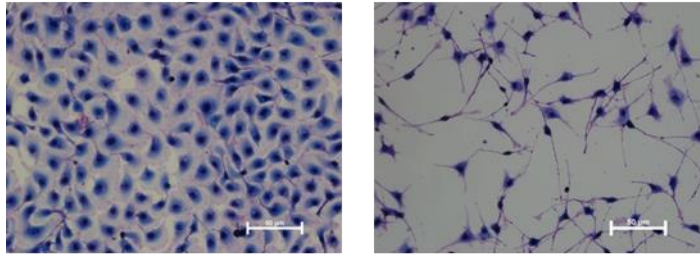

### Ag10

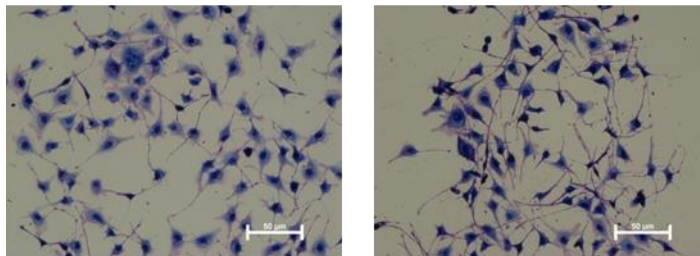

### Ag75

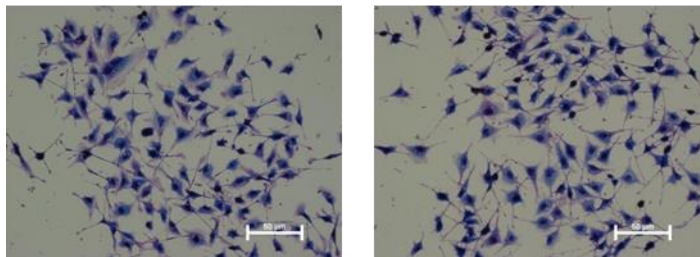

**Suppl. Figure 5. Colony forming efficiency.** Representative images of the colonies are included. Two distinct colony phenotypes were observed for the control (dense colonies with high cell-cell contact and sparse colonies with a low cell-cell contact) whereas the Ag treated cells displayed a more homogenous colony phenotype (mostly sparse colonies with a low cell-cell contact).
